# Supplementary material for: Nitrogen-doped carbon dots as a “turn-off” fluorescence probe for mercury(ii) detection and live cell imaging
Source: Royal Society of Chemistry journal article supplement (doi:10.1039/d4nj00104d), 2024-01-01
Supplement: d4nj00104d1.pdf [file d4nj00104d1.pdf]

## Electronic supplementary information

# Nitrogen-doped carbon dots as a “turn-off” fluorescence probe for mercury (II) detection and live cell imaging

Yufei Lei,<sup>a1</sup> Qi Li,<sup>a1</sup> Qian Li,<sup>a</sup> Dongxiu He,<sup>a</sup> Jinhua Xue,<sup>a</sup> Lifu Liao,<sup>a</sup> Jikai Wang<sup>\*a</sup>  
and Xilin Xiao<sup>\*ab</sup>

<sup>a</sup> *School of Chemistry and Chemical Engineering, School of Pharmaceutical Science, School of Public Health, Hunan Key Laboratory for the Design and Application of Actinide Complexes, University of South China, Hengyang, Hunan 421001, P. R. China.*

<sup>b</sup> *State Key Laboratory of Chemo/Biosensing and Chemometrics, Hunan University, Changsha, Hunan 410082, P. R. China.*

<sup>1</sup> *These authors contributed equally to this work.*

\* Corresponding authors

E-mail address: xiaoxl2001@163.com (Xilin Xiao). jkwang@hnu.edu.cn (Jikai Wang).

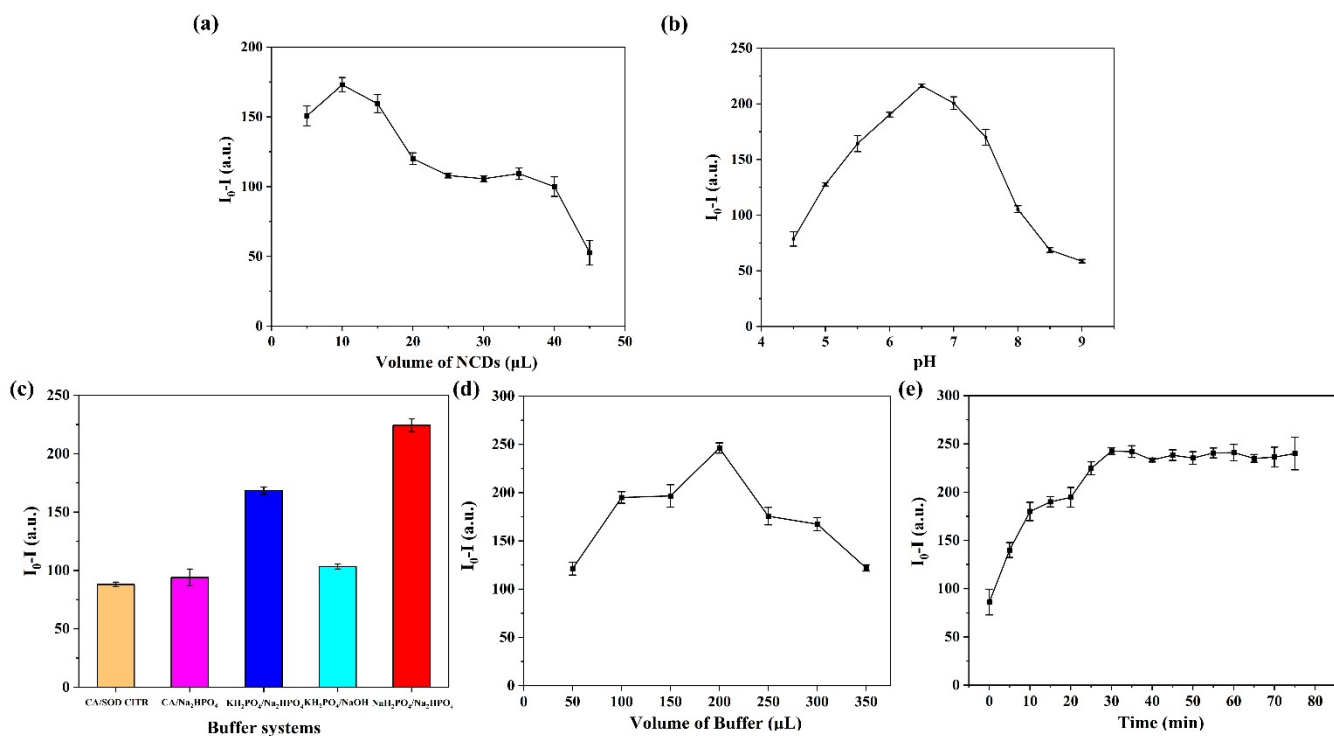

**Fig. S1** Optimization of (a) NCDs dosage, (b) pH, (c) buffer systems, (d) buffer volume and (e) reaction time for Hg<sup>2+</sup> detection.

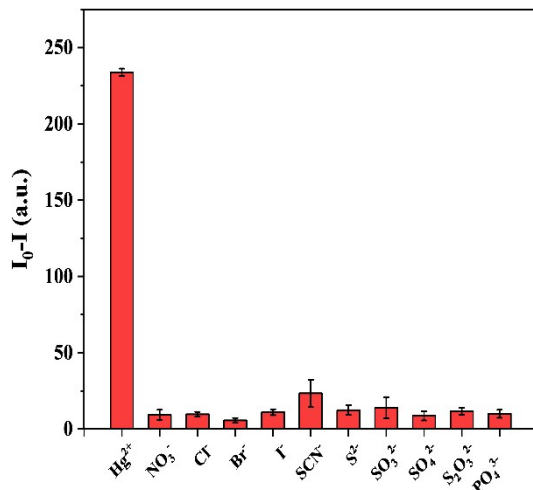

**Fig. S2** Influence of different anions on the fluorescence of NCDs.

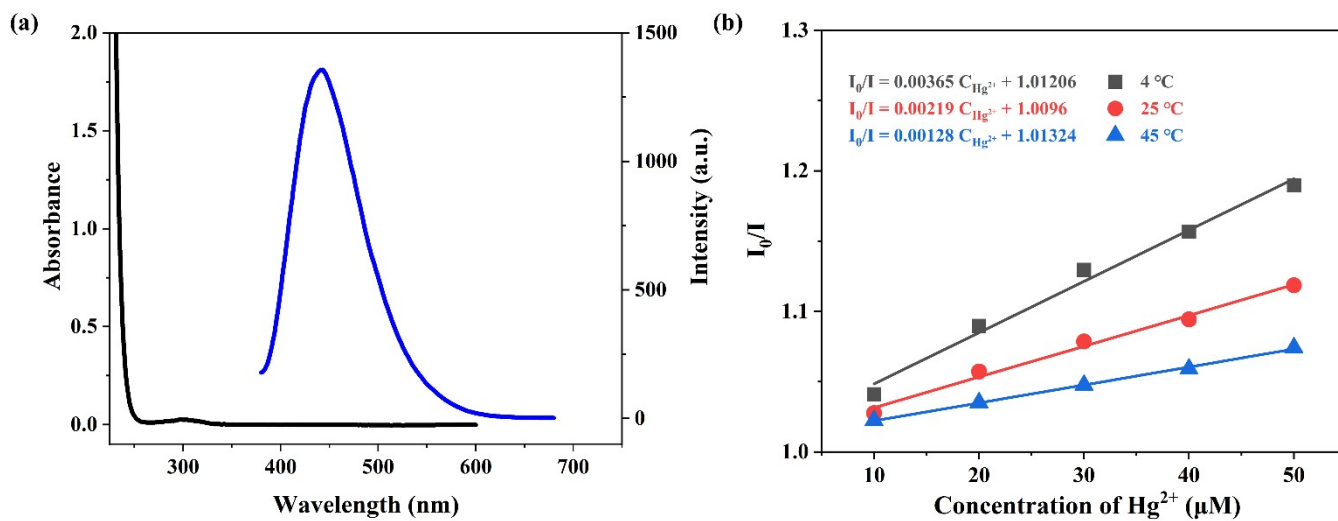

**Fig. S3** (a) The UV-vis spectrum of  $\text{Hg}^{2+}$  (black line) and the fluorescence emission spectrum of NCDs (blue line). (b) Stern-Volmer plots for the solution systems of NCDs and  $\text{Hg}^{2+}$  at different temperatures.
